# Supplementary material
Source: PubMed Central journal article supplement (PMC2518313)
Supplement: NIHMS60895-supplement-si20050909_040.pdf [file NIHMS60895-supplement-si20050909_040.pdf]

## SUPPORTING INFORMATION

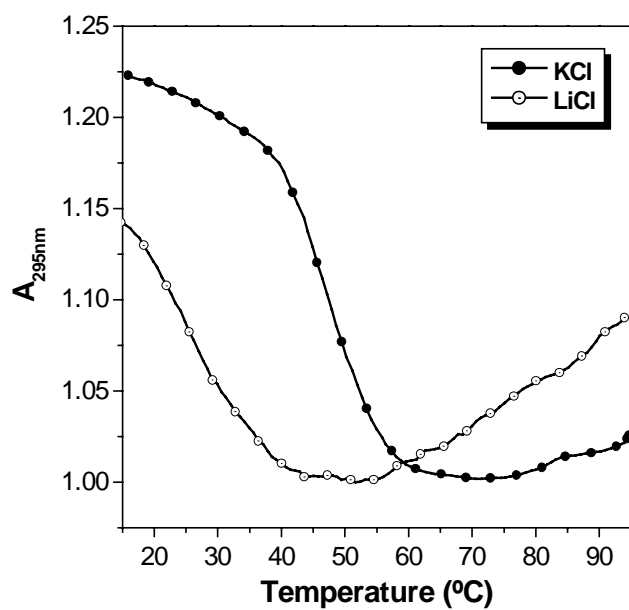

**Figure S1.** UV melting curves recorded at 295 nm for **RQ** with either 100 mM KCl (filled circles) or LiCl (open circles) included in the buffer. [RQ] = 2.0  $\mu$ M. Data were normalized to the lowest absorbance reading.

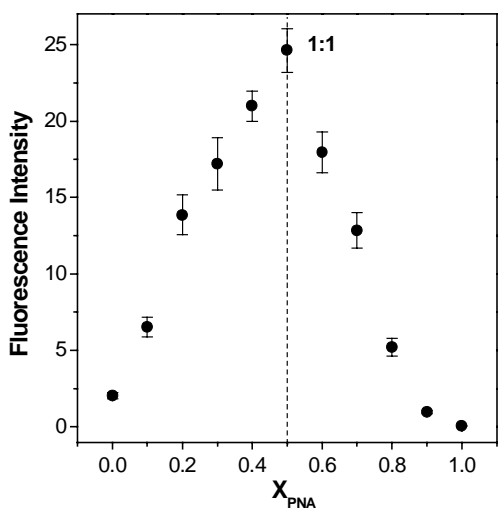

**Figure S2.** Continuous variations experiment to determine stoichiometry of **P7C<sub>T0</sub>-RQ** hybrid. Total [P7C<sub>T0</sub> + RQ] = 0.5  $\mu$ M. Fluorescence intensity was recorded at 536 nm.

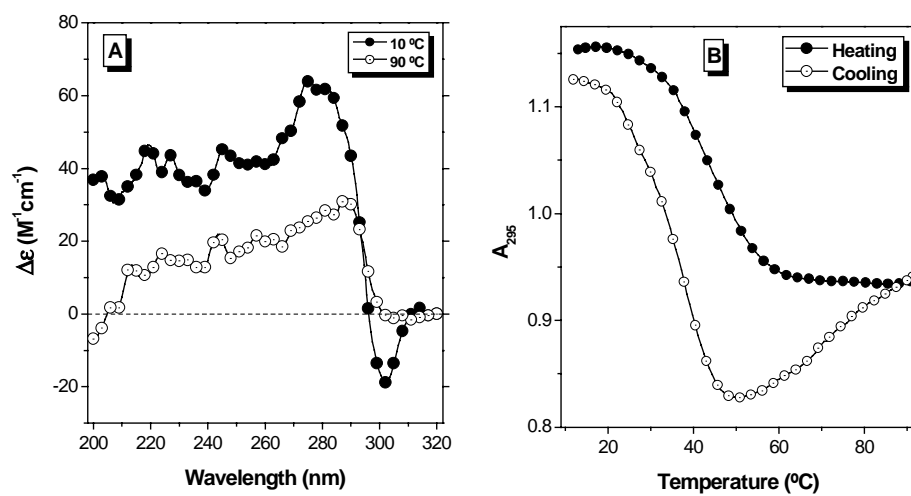

**Figure S3.** Characterization of **P7H** in 10 mM TrisHCl buffer (pH = 7.0), 100 mM KCl. [PNA] = 100  $\mu$ M. (A) CD spectra recorded at 10 °C (filled circles) and 90 °C (open circles). (B) UV melting curves recorded at 295 nm. Sample was heated (filled circles) or cooled (open circles) at a rate of 1.0 °C/min, with absorbance values recorded every 0.5 °C. Data were normalized to the highest temperature value.
